# Supplementary material
Source: publisher figshare collection journal article supplement (https://acs.figshare.com/ndownloader/files/23236187)
Supplement: Supplementary file 1 [file 23236187]

## **Supporting Information for -**

Selective Stabilization of Aspartic Acid Protonation State within a Given Protein  
Conformation Occurs via Specific ‘Molecular Association’

Debashree Bandyopadhyay<sup>#\*</sup>, Akshay Bhatnagar<sup>#<sup>1</sup></sup>, Shobhit Jain and Prabhav Pratyaksh

Department of Biological Sciences, Birla Institute of Technology and Science, Pilani,

Hyderabad campus, Hyderabad, INDIA, Pin 500078

<sup>1</sup>Current Address: Center for Cellular and Molecular Biology, Hyderabad, INDIA, 500007

<sup>#</sup>equal contribution

### **Corresponding author**

email: banerjee.debi@hyderabad.bits-pilani.ac.in; [banerjee\\_debi@yahoo.com](mailto:banerjee_debi@yahoo.com)

[Phone: +914066303595 \(O\); +918501841931 \(M\)](tel:+914066303595)

## Contents

|                                                                                                                   |    |
|-------------------------------------------------------------------------------------------------------------------|----|
| Table S1: The best fitted equation, fairly reproduce the dielectric values within the range of 2 to 47.....       | S3 |
| Table S2: Mulliken charges on OD2 and HD2 atoms of capped aspartic acid in different liquid media.....            | S3 |
| Figure S1: Titration curves obtained from constant pH MD simulations for aspartic acid in different solvents..... | S4 |
| Reference.....                                                                                                    | S4 |

Table S1: The best fitted equation, fairly reproduce the dielectric values within the range of 2 to 47.

| Solvent name    | Bond order (x) of Carboxylic acid O-H in Asp side chain | Dielectric constants (y) derived based on the equation; $y = 0.0563x^{-15.89}$ | Dielectric value for the respective solvents <sup>1</sup> | Error between computed and experimental dielectric values |
|-----------------|---------------------------------------------------------|--------------------------------------------------------------------------------|-----------------------------------------------------------|-----------------------------------------------------------|
| Water           | 0.693                                                   | 19.1                                                                           | 80.1                                                      | Too high                                                  |
| DMSO            | 0.658                                                   | 43.5                                                                           | 46.7                                                      | 3.2                                                       |
| Methanol        | 0.659                                                   | 42.5                                                                           | 32.7                                                      | 9.8                                                       |
| Ethanol         | 0.669                                                   | 33.4                                                                           | 24.5                                                      | 8.9                                                       |
| Acetone         | 0.688                                                   | 21.4                                                                           | 20.7                                                      | 0.7                                                       |
| Tetrahydrofuran | 0.7                                                     | 16.3                                                                           | 7.6                                                       | 8.7                                                       |
| Chlorobenzene   | 0.779                                                   | 3.0                                                                            | 5.62                                                      | 2.62                                                      |
| Benzene         | 0.779                                                   | 3.0                                                                            | 2.27                                                      | 0.73                                                      |
| Cyclohexane     | 0.773                                                   | 3.4                                                                            | 2.02                                                      | 1.38                                                      |

Table S2: Mulliken charges on OD2 and HD2 atoms of capped aspartic acid in different liquid media. Cases are highlighted where magnitude of negative and positive charge differences is less than 0.02, in order to identify the existence of a dipole. Electric dipole is defined as the product of either charge separated by a certain distance. In case, where the magnitude of charge difference is larger than 0.02 (choice of this threshold is empirical, based on the observation from this table), those are not considered as true dipoles

| Liquid media    | Mulliken charge on OD2 atom | Mulliken charge on HD2 atom |
|-----------------|-----------------------------|-----------------------------|
| Water           | -0.49                       | 0.51                        |
| DMSO            | -0.44                       | 0.50                        |
| Methanol        | -0.55                       | 0.53                        |
| Ethanol         | -0.45                       | 0.47                        |
| Acetone         | -0.51                       | 0.39                        |
| Tetrahydrofuran | -0.41                       | 0.39                        |
| Chlorobenzene   | -0.44                       | 0.38                        |
| Benzene         | -0.44                       | 0.45                        |
| Cyclohexane     | -0.40                       | 0.41                        |

Figure S1: Titration curves obtained from constant pH MD simulations for aspartic acid in solvent systems a) water b) methanol c) ethanol d) tetrahydrofuran e) dimethyl sulphoxide f) acetone g) cyclohexane h) benzene and i) chlorobenzene

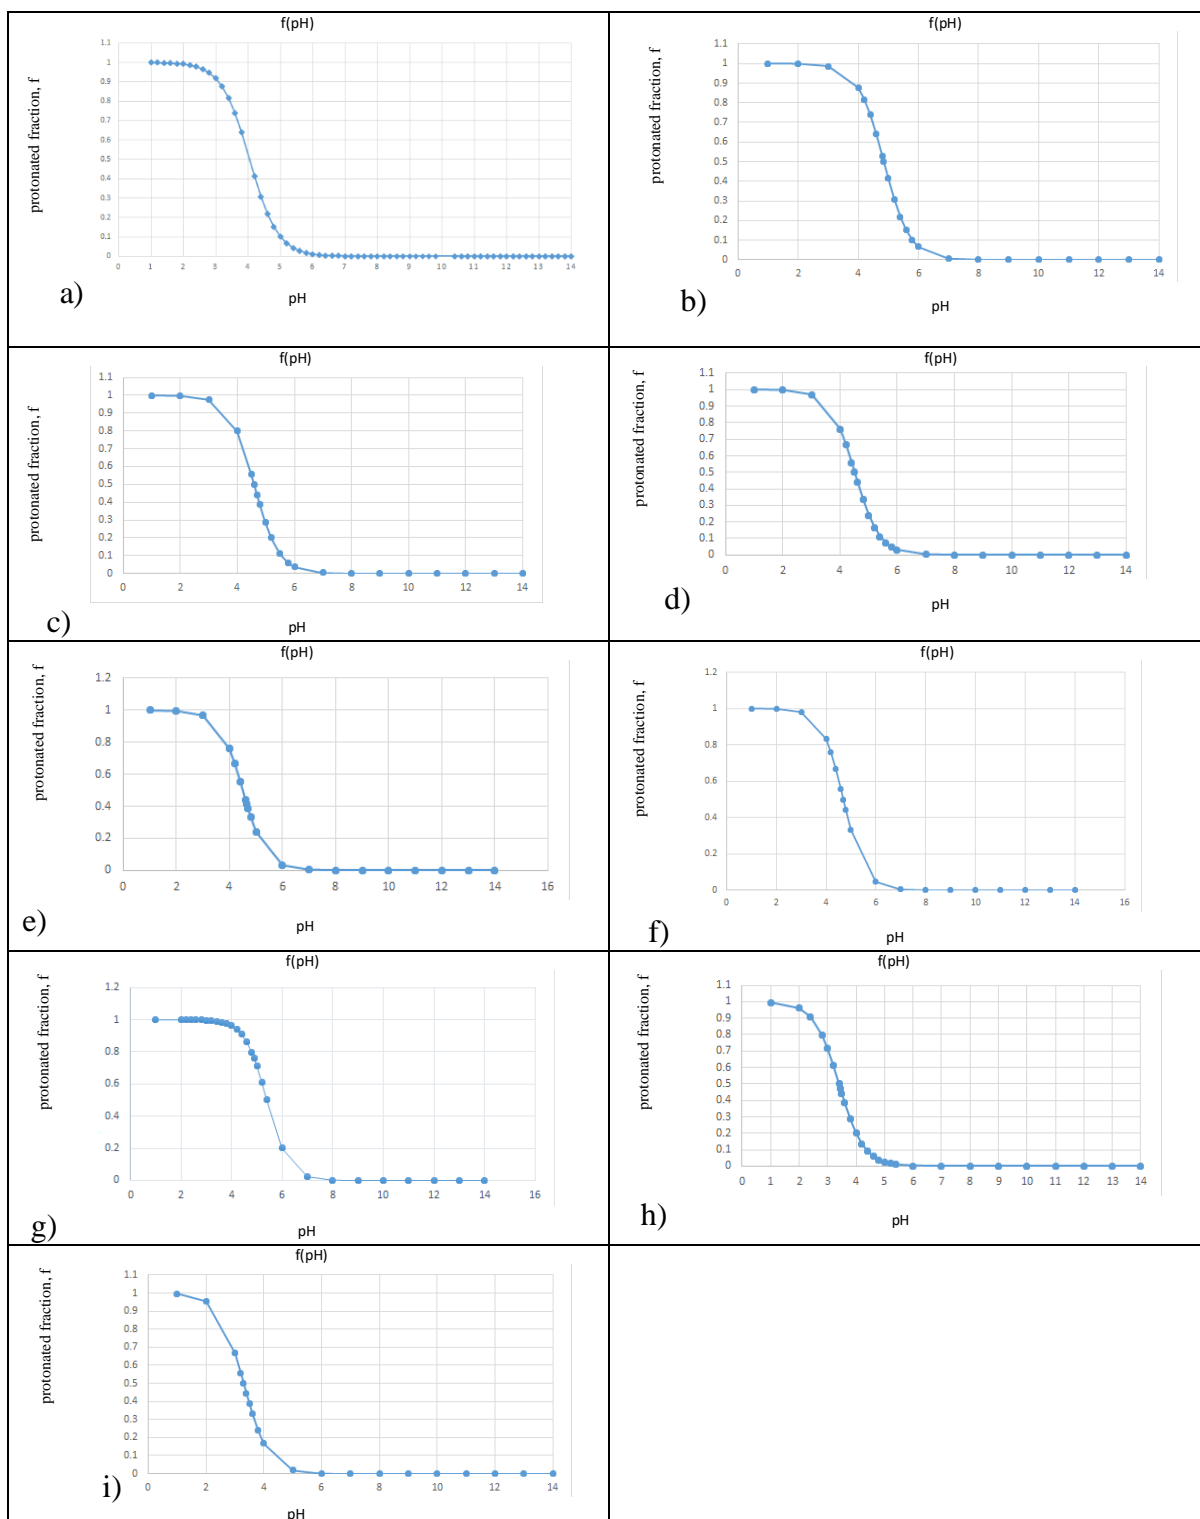

- (1) Arthur A Maryott; Edgar Reynolds Smith. *Table of Dielectric Constants of Pure Liquids*, National g.; Washington, U.S. Govt. Print. Off., National Bureau of Standards circular, 514, 1951.
